# Supplementary material for: Local Network Patterns in Protein-Protein Interfaces
Source: PLoS One. 2013 Mar 8;8(3):e57031. doi: 10.1371/journal.pone.0057031 (PMC3592891; doi:10.1371/journal.pone.0057031)
Supplement: File S2 — Counts of 4-tuples in Data Sets of Domain-Domain Interfaces, Homodimer Interfaces, and Heterodimer Interfaces. (XLS) [file pone.0057031.s002.xls]

## Sheet: domain-domain interfaces
four-tuples	A1	A2	A3	B1	C1	C2	D1	D2	E1	E2	F1
'SHNA'	9007	75201	1030	2662	363	5	4589	2843	1724	104	219
'SHNP'	7578	70459	763	1751	308	6	3690	2286	1532	122	193
'SHNfP'	6760	62712	863	1975	380	4	3754	2300	1526	98	188
'SHNdfP'	2899	28084	238	614	156	1	1569	843	711	38	83
'SHAP'	12407	108591	1826	3861	517	13	6554	4836	2741	233	341
'SHAfP'	9180	76908	1361	2882	440	3	4910	3366	2011	118	227
'SHAdfP'	4224	34713	441	1281	161	2	2235	1314	790	53	108
'SHPfP'	7576	69640	963	2124	355	7	3968	2603	1641	120	212
'SHPdfP'	3334	30714	290	838	162	1	1700	988	729	47	95
'SHfPdfP'	1991	18631	225	472	98	1	954	529	381	26	48
'SNAP'	4146	39812	553	1327	174	2	2227	1511	891	79	132
'SNAfP'	3644	36840	520	1165	230	4	2309	1625	1072	51	136
'SNAdfP'	1531	16545	168	488	92	1	1060	614	407	20	49
'SNPfP'	3133	35673	502	1008	165	2	1907	1395	854	56	116
'SNPdfP'	1421	16476	152	403	70	2	821	513	391	26	53
'SNfPdfP'	1034	11536	120	339	65	0	644	411	247	16	37
'SAPfP'	4143	38935	703	1421	199	3	2456	1799	1008	76	129
'SAPdfP'	1731	17658	265	608	82	0	975	691	402	22	55
'SAfPdfP'	1169	10308	117	344	63	0	605	368	227	17	34
'SPfPdfP'	859	10198	130	280	43	0	490	339	167	14	31
'HNAP'	5323	43245	665	1507	199	5	2500	1703	988	69	115
'HNAfP'	4864	41220	679	1325	284	0	2607	1848	1245	73	152
'HNAdfP'	2412	21150	314	652	152	2	1254	897	677	44	86
'HNPfP'	3749	36166	559	1050	216	2	2087	1360	960	56	103
'HNPdfP'	1794	18920	170	411	74	0	996	605	480	34	68
'HNfPdfP'	1299	13583	163	334	65	1	737	446	311	26	59
'HAPfP'	5275	43088	807	1601	291	8	2648	1884	1120	91	107
'HAPdfP'	2489	21879	361	683	122	2	1339	875	551	38	68
'HAfPdfP'	1669	13033	214	439	63	1	769	528	293	20	37
'HPfPdfP'	1146	11227	123	271	44	1	542	352	231	16	26
'NAPfP'	2315	21553	364	735	125	4	1278	977	587	53	86
'NAPdfP'	1054	11370	167	324	68	2	641	489	298	15	40
'NAfPdfP'	761	8265	130	233	42	1	488	341	195	23	20
'NPfPdfP'	613	7686	101	201	49	0	376	290	190	15	26
'APfPdfP'	655	6729	106	219	43	0	406	253	150	6	14
'SHHH'	16182	114128	2027	4913	854	17	8336	5902	3703	229	411
'SSSH'	8196	66946	760	2130	317	1	4079	2332	1723	109	247
'SSHH'	15782	115416	1507	4154	699	6	7712	4744	3230	210	416
'SNNN'	247	2258	12	60	12	0	90	43	40	1	4
'SSSN'	2317	22570	224	576	101	4	1246	705	591	52	73
'SSNN'	1000	10836	109	201	50	0	498	245	200	21	34
'SAAA'	1345	13070	376	555	81	0	784	717	355	47	51
'SSSA'	3091	30007	421	1109	141	1	1844	1247	759	48	95
'SSAA'	2759	27248	552	1140	93	3	1701	1278	694	57	91
'SPPP'	975	11430	176	299	57	1	618	470	372	23	34
'SSSP'	3267	32450	331	711	154	0	1857	1063	792	61	110
'SSPP'	2629	26798	335	618	95	3	1441	918	706	49	126
'SfPfPfP'	341	3555	75	159	21	0	204	134	114	6	5
'SSSfP'	2097	22218	301	547	102	0	1196	731	491	45	76
'SSfPfP'	1240	12729	197	408	50	1	716	523	290	17	35
'SdfPdfPdfP'	33	251	1	3	0	0	6	4	3	1	1
'SSSdfP'	737	7898	49	168	43	2	369	175	183	14	18
'SSdfPdfP'	183	1938	17	37	8	0	90	60	43	2	3
'HNNN'	297	2281	32	54	9	0	95	49	28	1	3
'HHHN'	6054	41761	544	1598	239	5	2858	1675	1130	72	103
'HHNN'	1869	13324	138	469	70	0	788	394	233	13	28
'HAAA'	2020	16774	559	773	130	4	1103	1224	648	66	79
'HHHA'	9585	73703	1764	3116	702	15	5586	4644	3024	243	389
'HHAA'	6001	49959	1275	2052	443	21	3700	3210	1910	144	244
'HPPP'	1215	11572	181	357	44	1	648	482	295	27	53
'HHHP'	7761	57181	919	2217	389	7	3801	2673	1631	97	189
'HHPP'	3959	32350	533	972	184	2	1964	1375	899	51	133
'HfPfPfP'	428	3443	79	140	17	1	201	132	59	3	9
'HHHfP'	5356	40989	771	1538	254	5	2615	1921	1138	102	133
'HHfPfP'	2024	15674	292	545	98	0	932	624	364	26	40
'HdfPdfPdfP'	51	391	4	6	1	0	15	18	5	0	1
'HHHdfP'	3043	20665	288	752	117	0	1483	976	595	34	62
'HHdfPdfP'	483	3901	42	96	18	0	233	121	98	9	11
'NAAA'	714	5487	133	247	43	0	366	287	196	16	15
'NNNA'	167	1325	26	49	7	0	68	41	15	0	1
'NNAA'	535	4099	72	172	18	0	280	175	71	2	7
'NPPP'	461	5395	77	116	27	0	294	223	159	3	29
'NNNP'	190	1610	9	34	4	0	68	31	28	0	4
'NNPP'	394	4656	52	102	23	0	257	124	105	8	20
'NfPfPfP'	224	2600	29	90	19	0	154	102	76	4	22
'NNNfP'	214	2092	20	57	10	0	110	49	39	1	3
'NNfPfP'	377	4197	61	110	36	1	257	170	137	4	19
'NdfPdfPdfP'	35	289	3	2	4	0	13	3	6	1	1
'NNNdfP'	112	1152	16	17	6	0	35	25	15	0	2
'NNdfPdfP'	103	1099	13	26	8	0	55	43	35	1	10
'APPP'	650	6467	100	187	38	0	374	316	174	12	18
'AAAP'	939	7942	239	357	31	0	516	496	268	26	35
'AAPP'	1101	9983	205	382	41	1	582	531	283	16	45
'AfPfPfP'	280	2097	79	102	25	0	166	108	53	6	2
'AAAfP'	798	5520	158	248	51	0	469	359	178	10	22
'AAfPfP'	776	4759	110	200	39	0	356	314	176	12	16
'AdfPdfPdfP'	17	199	3	11	1	0	11	10	4	0	0
'AAAdfP'	326	2580	70	112	11	0	150	164	76	9	6
'AAdfPdfP'	125	1131	29	33	10	0	61	39	27	1	2
'PfPfPfP'	219	2049	53	83	8	0	98	88	43	2	6
'PPPfP'	403	4022	80	152	21	0	222	152	98	9	17
'PPfPfP'	414	4051	80	121	23	0	276	161	88	4	13
'PdfPdfPdfP'	21	171	6	2	0	0	6	13	1	0	1
'PPPdfP'	163	2174	37	49	12	0	103	80	38	3	9
'PPdfPdfP'	85	874	11	18	6	0	41	46	11	1	0
'fPdfPdfPdfP'	6	85	0	0	1	0	6	1	4	0	0
'fPfPfPdfP'	49	351	2	15	4	0	15	11	6	0	0
'fPfPdfPdfP'	39	168	2	6	0	0	15	7	1	0	0
'SSHN'	7416	63830	572	1656	283	6	3679	1984	1478	84	172
'HHSN'	10766	77470	925	2431	400	2	4774	2870	1840	116	208
'NNSH'	2410	20548	192	481	81	1	1011	495	375	26	42
'SSHA'	11756	100793	1468	3861	455	7	6211	4235	2478	183	332
'HHSA'	17418	138003	2636	5499	841	21	9512	6761	3956	318	494
'AASH'	7735	67907	1473	2693	406	21	4399	3523	1931	181	254
'SSHP'	10773	95047	1073	2744	444	10	5461	3301	2378	181	370
'HHSP'	15026	113527	1638	3931	656	7	7094	4661	3056	199	341
'PPSH'	5701	53504	732	1509	236	6	3069	2000	1315	123	216
'SSHfP'	7160	65285	795	2109	326	4	3670	2192	1482	96	176
'HHSfP'	9944	79947	1252	2824	424	5	4957	3404	2036	140	212
'fPfPSH'	2863	25775	427	800	138	0	1436	1039	588	46	79
'SSHdfP'	2921	25825	196	617	127	0	1507	706	652	29	91
'HHSdfP'	4628	35904	386	1089	183	1	2259	1383	908	41	126
'dfPdfPSH'	536	4716	44	129	9	1	254	147	104	11	18
'SSNA'	3483	33821	357	1210	173	2	1984	1306	803	56	107
'NNSA'	1257	12217	149	387	56	1	627	396	237	15	33
'AASN'	2378	22431	358	928	100	1	1404	922	598	36	90
'SSNP'	3269	35956	366	828	134	1	1836	1173	858	42	111
'NNSP'	1260	13475	114	285	55	0	635	357	243	7	27
'PPSN'	2034	22809	248	468	90	1	1097	728	529	29	72
'SSNfP'	2894	31368	404	956	134	2	1740	1148	753	50	106
'NNSfP'	1309	14123	194	435	60	1	795	510	368	17	23
'fPfPSN'	1426	15789	228	503	84	1	985	629	460	29	64
'SSNdfP'	1156	12061	102	291	65	1	666	365	301	12	33
'NNSdfP'	571	6327	58	146	25	0	313	171	121	12	19
'dfPdfPSN'	250	3034	34	76	14	1	163	101	84	9	16
'SSAP'	5018	48843	715	1634	190	2	2811	1977	1170	109	162
'AASP'	3445	31867	633	1300	162	4	1996	1693	867	76	134
'PPSA'	3002	30016	490	963	126	1	1648	1320	774	65	134
'SSAfP'	3587	34241	537	1258	177	0	2133	1338	849	63	131
'AASfP'	2809	22813	486	990	134	5	1509	1055	646	56	81
'fPfPSA'	1773	14355	274	581	85	0	918	669	356	24	50
'SSAdfP'	1446	13301	130	491	49	1	862	411	328	17	34
'AASdfP'	1039	9779	166	448	54	1	642	375	262	14	27
'dfPdfPSA'	322	2465	20	107	15	0	145	103	48	2	3
'SSPfP'	3281	34828	380	971	143	1	1794	1212	769	51	126
'PPSfP'	1823	20067	245	614	88	1	1095	714	444	27	60
'fPfPSP'	1436	14338	201	445	55	1	809	566	317	21	50
'SSPdfP'	1255	14084	134	364	57	1	725	450	307	20	37
'PPSdfP'	812	9250	101	224	43	0	464	305	169	12	30
'dfPdfPSP'	244	2574	32	57	8	0	104	85	53	4	4
'SSfPdfP'	760	8399	83	188	36	0	448	248	185	7	20
'fPfPSdfP'	342	3047	35	114	15	0	167	94	55	3	7
'dfPdfPSfP'	126	1240	9	37	6	0	84	27	14	1	3
'HHNA'	7529	53853	852	2168	269	5	3530	2416	1372	80	132
'NNHA'	1791	13839	189	549	68	2	806	441	244	23	22
'AAHN'	3624	27377	548	1143	133	2	1975	1305	752	58	74
'HHNP'	5533	42651	566	1249	217	4	2337	1552	1020	56	104
'NNHP'	1531	13307	107	307	59	0	651	346	275	14	40
'PPHN'	2384	22877	250	503	79	0	1206	748	503	25	72
'HHNfP'	4631	39190	580	1190	291	4	2455	1640	1197	66	148
'NNHfP'	1602	15069	189	429	84	1	934	512	351	27	37
'fPfPHN'	1721	16419	239	544	111	2	1036	672	466	19	51
'HHNdfP'	2494	20079	248	551	155	2	1225	759	605	21	75
'NNHdfP'	736	7926	68	161	44	0	436	235	157	7	28
'dfPdfPHN'	422	4066	40	82	21	0	255	131	99	3	19
'HHAP'	9543	73407	1435	2758	470	10	4701	3500	2081	158	255
'AAHP'	4622	38587	834	1534	249	3	2485	2048	1121	92	129
'PPHA'	3732	32738	551	1071	193	4	1957	1347	809	61	109
'HHAfP'	7005	52875	1053	2040	337	6	3522	2596	1513	101	157
'AAHfP'	3566	27193	609	1139	181	5	1913	1445	820	68	109
'fPfPHA'	2218	15666	272	640	75	2	1004	747	442	28	44
'HHAdfP'	3587	27543	423	1073	167	3	1865	1193	724	60	73
'AAHdfP'	1715	14003	271	547	72	1	912	667	389	22	46
'dfPdfPHA'	514	3846	49	146	17	0	223	140	81	6	10
'HHPfP'	5317	42375	716	1459	227	3	2445	1800	1058	80	147
'PPHfP'	2247	20264	293	622	112	1	1138	815	445	37	54
'fPfPHP'	1635	14077	289	400	73	3	805	590	312	21	29
'HHPdfP'	2689	20619	241	594	124	1	1173	729	517	29	78
'PPHdfP'	1039	9849	110	227	40	0	529	317	204	11	23
'dfPdfPHP'	349	3120	38	75	28	0	126	97	65	3	15
'HHfPdfP'	1636	12677	189	400	65	0	703	434	238	11	23
'fPfPHdfP'	394	3316	53	109	14	0	180	101	56	5	7
'dfPdfPHfP'	188	1551	17	48	7	0	87	43	27	0	0
'NNAP'	857	7410	133	226	32	1	397	223	152	11	21
'AANP'	1629	13320	268	482	76	1	865	570	323	31	24
'PPNA'	1309	12962	173	316	60	0	688	503	320	20	39
'NNAfP'	870	9053	117	288	43	1	577	353	237	19	22
'AANfP'	1477	12646	230	443	98	2	876	666	477	26	68
'fPfPNA'	1103	9824	146	283	59	0	724	420	352	17	38
'NNAdfP'	411	5056	70	111	24	1	273	182	118	7	11
'AANdfP'	613	6354	146	192	38	0	385	345	197	19	21
'dfPdfPNA'	244	2514	46	76	17	0	138	120	56	7	4
'NNPfP'	767	8498	128	219	51	0	517	352	241	11	27
'PPNfP'	973	10769	172	300	53	1	609	439	298	20	28
'fPfPNP'	774	9035	161	260	57	0	532	401	260	15	38
'NNPdfP'	350	4697	34	101	33	0	248	159	130	5	9
'PPNdfP'	425	6014	61	143	29	1	307	239	146	11	21
'dfPdfPNP'	187	2319	30	45	9	0	129	73	59	3	7
'NNfPdfP'	307	3671	50	72	15	0	177	160	87	6	8
'fPfPNdfP'	269	2748	41	78	15	0	144	106	62	3	3
'dfPdfPNfP'	128	1298	16	36	1	0	85	30	44	0	4
'AAPfP'	1735	13297	291	537	79	1	956	701	410	28	63
'PPAfP'	1254	11921	246	427	59	0	714	510	324	14	32
'fPfPAP'	998	8201	206	388	41	1	545	425	220	21	23
'AAPdfP'	647	6667	140	199	30	1	361	247	167	7	23
'PPAdfP'	593	6038	118	150	35	9	307	212	121	5	13
'dfPdfPAP'	187	1848	46	58	13	0	99	56	42	3	0
'AAfPdfP'	513	3834	70	126	23	0	241	180	82	7	11
'fPfPAdfP'	284	1896	43	91	16	1	96	84	45	3	4
'dfPdfPAfP'	122	939	11	34	13	0	60	35	12	0	2
'PPfPdfP'	308	3285	51	88	16	0	146	107	69	7	6
'fPfPPdfP'	173	1996	33	51	12	0	88	57	42	4	5
'dfPdfPPfP'	94	818	8	23	6	0	40	26	27	0	1
'SSSS'	2042	18002	193	479	100	2	1158	651	532	36	73
'HHHH'	6835	49585	1183	2211	506	7	3775	3225	2165	203	230
'NNNN'	24	181	0	4	1	0	7	2	1	0	0
'AAAA'	286	2451	123	128	19	0	176	169	78	13	16
'PPPP'	196	1961	50	52	12	0	116	96	56	9	11
'fPfPfPfP'	49	354	18	20	0	0	20	18	5	0	1
'dfPdfPdfPdfP'	3	12	0	0	0	0	0	0	0	0	0

## Sheet: homodimer interfaces
four-tuples	A1	A2	A3	B1	C1	C2	D1	D2	E1	E2	F1
'SHNA'	4356	36909	362	1148	195	0	2183	1081	756	38	86
'SHNP'	3727	34346	212	659	168	0	1671	806	693	31	78
'SHNfP'	3558	37304	269	924	188	0	1812	969	781	37	122
'SHNdfP'	1581	17165	147	342	99	0	796	403	348	11	31
'SHAP'	5741	48198	579	1570	287	5	2883	1706	1180	86	126
'SHAfP'	4131	35358	463	1194	203	2	2072	1243	737	57	79
'SHAdfP'	1835	17838	205	543	75	0	921	542	408	28	47
'SHPfP'	3772	33584	291	789	176	4	1860	940	735	33	67
'SHPdfP'	1684	16566	115	345	74	2	794	395	311	31	35
'SHfPdfP'	1026	9608	91	254	46	0	489	232	152	7	23
'SNAP'	1775	18170	167	434	99	0	938	459	406	21	33
'SNAfP'	1805	18692	177	503	120	1	1019	597	462	34	58
'SNAdfP'	697	9879	69	189	35	0	497	239	194	4	39
'SNPfP'	1496	18225	152	389	89	2	805	463	376	23	39
'SNPdfP'	691	9321	72	143	45	0	413	271	179	8	24
'SNfPdfP'	589	7680	45	137	31	0	321	194	177	5	10
'SAPfP'	1710	17451	186	508	74	0	931	615	399	18	38
'SAPdfP'	775	8793	93	228	40	0	451	283	185	9	24
'SAfPdfP'	437	5286	60	130	19	0	239	143	112	6	16
'SPfPdfP'	459	5279	28	76	18	0	201	155	70	5	11
'HNAP'	2672	20636	239	620	114	3	1094	687	460	17	56
'HNAfP'	2379	21869	304	674	156	3	1076	791	541	32	81
'HNAdfP'	1205	11633	98	303	84	0	634	392	306	12	23
'HNPfP'	2131	21963	207	537	117	0	1096	574	469	18	47
'HNPdfP'	1217	11159	102	237	83	0	565	315	298	14	22
'HNfPdfP'	855	8484	57	177	48	0	457	230	179	9	18
'HAPfP'	2420	20610	277	687	98	0	1144	743	428	28	62
'HAPdfP'	1418	10549	146	356	64	0	593	357	262	23	32
'HAfPdfP'	727	6176	74	194	31	1	299	200	96	1	8
'HPfPdfP'	720	6417	34	125	22	0	312	129	142	1	10
'NAPfP'	1034	10708	121	283	38	0	589	313	231	22	28
'NAPdfP'	553	5838	69	152	22	0	303	165	167	7	25
'NAfPdfP'	416	4960	46	116	26	0	269	164	96	4	18
'NPfPdfP'	344	5010	29	77	22	0	187	143	99	2	18
'APfPdfP'	307	3323	42	100	21	0	142	128	69	4	2
'SHHH'	9321	64319	833	2213	413	2	4267	2517	1872	102	159
'SSSH'	3392	30245	168	615	202	0	1727	737	751	18	71
'SSHH'	8232	55798	653	1507	466	6	3480	1800	1722	55	192
'SNNN'	205	2380	13	39	4	0	84	24	26	0	4
'SSSN'	1008	11419	65	117	39	0	583	193	258	7	30
'SSNN'	806	7381	52	91	47	0	356	138	205	1	32
'SAAA'	879	7517	176	314	29	1	451	472	229	11	31
'SSSA'	1528	14905	145	391	97	2	835	481	345	17	55
'SSAA'	1877	14014	304	537	129	3	973	659	491	26	80
'SPPP'	606	7570	66	151	35	0	390	218	159	11	16
'SSSP'	1198	14258	58	215	59	0	634	329	301	11	42
'SSPP'	1272	13666	153	262	85	1	643	335	357	17	53
'SfPfPfP'	278	2513	34	52	16	0	126	90	46	0	2
'SSSfP'	1008	10688	82	235	42	0	517	275	233	9	27
'SSfPfP'	856	6593	79	144	70	0	334	179	165	3	27
'SdfPdfPdfP'	5	305	1	5	3	0	5	7	5	0	0
'SSSdfP'	395	4727	12	72	15	0	179	97	109	7	4
'SSdfPdfP'	113	1679	31	13	16	0	51	39	34	1	7
'HNNN'	279	2824	23	34	4	0	92	47	37	4	6
'HHHN'	4377	29687	268	852	152	1	1771	846	706	26	51
'HHNN'	1569	11047	139	250	83	0	522	284	284	9	42
'HAAA'	1171	9948	284	343	69	1	605	609	344	29	29
'HHHA'	5499	45434	963	1593	361	18	3074	2412	1433	95	168
'HHAA'	3511	28433	826	1040	266	20	1880	1595	1099	98	182
'HPPP'	894	8767	116	198	54	0	478	302	246	18	21
'HHHP'	5363	38499	528	1334	294	3	2384	1648	1072	68	114
'HHPP'	3253	21421	409	667	196	7	1354	854	699	43	116
'HfPfPfP'	396	3462	30	103	12	0	179	130	51	3	10
'HHHfP'	3821	27725	358	845	155	1	1618	1019	695	31	63
'HHfPfP'	1714	11728	214	364	107	6	594	411	329	23	46
'HdfPdfPdfP'	18	432	3	9	1	0	7	5	2	0	0
'HHHdfP'	1917	15060	210	390	80	0	851	483	407	14	33
'HHdfPdfP'	481	3415	88	75	26	0	173	89	105	5	21
'NAAA'	323	3443	60	104	20	0	155	116	102	1	9
'NNNA'	130	1355	19	28	1	0	43	35	23	0	0
'NNAA'	456	2952	86	114	32	1	147	96	73	1	13
'NPPP'	219	3351	45	54	20	0	171	97	84	3	13
'NNNP'	112	1479	8	37	4	0	46	20	26	0	0
'NNPP'	277	3134	44	56	37	0	109	74	104	0	16
'NfPfPfP'	253	3451	36	66	22	0	174	103	76	9	7
'NNNfP'	178	2990	30	59	11	0	144	66	38	2	1
'NNfPfP'	452	5252	83	107	41	3	237	183	197	3	40
'NdfPdfPdfP'	13	445	3	5	0	0	10	9	2	0	0
'NNNdfP'	98	1500	10	26	9	0	75	20	24	2	4
'NNdfPdfP'	96	1181	30	19	22	0	53	41	61	1	2
'APPP'	495	4415	66	150	17	0	226	201	118	4	7
'AAAP'	495	3854	102	160	36	1	234	185	136	6	10
'AAPP'	738	5339	124	187	59	0	345	239	207	10	18
'AfPfPfP'	204	1768	35	44	14	0	81	50	40	5	2
'AAAfP'	313	3247	57	86	14	0	187	140	85	2	10
'AAfPfP'	444	3289	83	84	29	1	160	124	125	2	19
'AdfPdfPdfP'	22	252	5	6	1	0	8	10	6	0	6
'AAAdfP'	163	1487	15	50	9	0	68	82	43	4	5
'AAdfPdfP'	136	801	22	13	11	0	36	16	36	0	8
'PfPfPfP'	175	1842	17	34	5	0	88	50	60	2	2
'PPPfP'	278	3282	27	89	19	0	176	80	82	4	7
'PPfPfP'	370	3181	62	61	46	1	185	106	107	2	16
'PdfPdfPdfP'	4	139	0	4	1	0	3	3	2	0	0
'PPPdfP'	117	1813	11	26	3	0	65	55	24	0	6
'PPdfPdfP'	92	726	15	18	9	0	13	12	19	0	3
'fPdfPdfPdfP'	5	98	0	2	1	0	3	0	0	0	0
'fPfPfPdfP'	25	375	2	7	3	0	19	8	7	0	0
'fPfPdfPdfP'	36	191	13	9	1	0	8	6	13	0	3
'SSHN'	3771	33424	128	575	202	1	1734	707	679	24	84
'HHSN'	6126	42924	276	1027	247	2	2472	1105	906	27	91
'NNSH'	1598	14894	89	268	93	0	741	349	281	9	22
'SSHA'	5548	46890	496	1452	249	2	2761	1560	1146	69	138
'HHSA'	8730	67854	1042	2413	361	6	4217	2825	1789	109	190
'AASH'	3885	33631	573	1214	182	4	2227	1635	952	60	105
'SSHP'	4811	42057	340	990	192	3	2168	1206	995	47	124
'HHSP'	7442	56821	673	1673	292	1	3327	2051	1331	73	175
'PPSH'	3036	28216	336	719	176	0	1562	951	681	38	89
'SSHfP'	3464	32864	249	739	177	3	1806	886	739	43	96
'HHSfP'	5537	43080	448	1243	253	4	2334	1469	1022	61	111
'fPfPSH'	1682	15293	145	372	71	0	797	455	318	9	34
'SSHdfP'	1499	15360	100	320	72	0	718	317	301	10	45
'HHSdfP'	2599	21358	222	604	98	0	1086	649	444	30	51
'dfPdfPSH'	284	3972	51	70	18	0	119	95	45	5	11
'SSNA'	1658	17100	106	466	86	0	961	500	398	14	68
'NNSA'	800	7940	40	214	28	0	394	187	158	11	13
'AASN'	1323	11967	153	400	57	1	687	441	300	16	24
'SSNP'	1365	16187	92	258	65	0	740	384	287	13	36
'NNSP'	621	8021	47	109	38	2	326	167	131	7	13
'PPSN'	914	11193	89	178	56	0	524	305	255	8	19
'SSNfP'	1355	17470	120	340	73	0	809	424	386	19	49
'NNSfP'	914	11499	92	230	57	0	537	323	214	9	28
'fPfPSN'	830	11856	102	272	50	0	594	318	249	15	32
'SSNdfP'	584	8299	62	131	32	1	392	185	170	6	20
'NNSdfP'	395	5400	44	98	17	2	234	146	97	10	13
'dfPdfPSN'	195	2692	46	32	16	0	91	55	44	1	4
'SSAP'	2207	22578	250	546	96	5	1163	748	530	31	56
'AASP'	1695	15342	242	528	80	0	918	688	398	35	40
'PPSA'	1471	15247	224	451	68	2	805	582	353	17	50
'SSAfP'	1580	16133	197	453	71	0	898	496	361	31	37
'AASfP'	1156	11679	124	376	70	0	693	419	312	18	38
'fPfPSA'	883	7875	87	196	60	0	400	239	189	9	26
'SSAdfP'	604	8240	63	187	16	0	394	221	142	5	24
'AASdfP'	425	5444	62	176	22	0	287	215	138	6	21
'dfPdfPSA'	155	2116	25	29	8	0	70	62	28	0	4
'SSPfP'	1278	15255	103	340	70	0	828	332	355	25	32
'PPSfP'	903	10107	115	255	59	0	437	288	265	9	24
'fPfPSP'	659	7545	71	176	36	0	395	206	158	8	12
'SSPdfP'	624	7436	42	125	27	0	339	165	141	2	20
'PPSdfP'	353	5700	49	75	22	0	229	145	106	13	13
'dfPdfPSP'	147	1872	26	31	11	0	74	35	8	2	4
'SSfPdfP'	377	4468	34	117	19	0	167	97	71	5	5
'fPfPSdfP'	173	1715	26	35	7	0	79	46	23	6	5
'dfPdfPSfP'	70	988	12	14	4	0	52	24	3	2	4
'HHNA'	4050	30173	351	1043	130	0	1791	920	669	41	52
'NNHA'	1164	9037	110	269	40	0	407	282	177	7	26
'AAHN'	1679	15512	220	514	77	0	904	579	348	18	28
'HHNP'	3535	25488	233	659	122	0	1486	758	608	24	57
'NNHP'	892	8952	65	170	44	0	402	180	161	5	13
'PPHN'	1566	13352	140	314	89	1	675	374	286	20	27
'HHNfP'	2967	25961	279	642	193	0	1382	915	753	26	70
'NNHfP'	1146	13331	91	275	65	0	625	298	240	11	23
'fPfPHN'	1267	14236	140	333	98	0	768	425	351	21	25
'HHNdfP'	1725	13436	152	343	108	0	755	454	325	13	42
'NNHdfP'	638	6507	50	138	33	0	310	159	102	5	12
'dfPdfPHN'	318	3343	48	70	17	0	160	100	79	8	5
'HHAP'	5397	37973	654	1490	224	8	2525	1745	1017	89	117
'AAHP'	2359	18986	380	718	111	0	1236	823	518	24	64
'PPHA'	2187	18036	342	688	113	1	1089	780	481	44	45
'HHAfP'	3533	28323	483	1128	149	3	1787	1103	664	46	73
'AAHfP'	1528	14449	253	507	62	4	868	673	347	18	42
'fPfPHA'	1120	9764	187	349	40	0	532	415	226	23	21
'HHAdfP'	1788	14528	211	458	64	1	869	607	343	12	37
'AAHdfP'	908	7204	112	233	43	0	423	291	194	9	17
'dfPdfPHA'	292	2851	43	95	14	0	139	95	69	1	4
'HHPfP'	3303	25945	283	713	180	3	1418	914	702	42	82
'PPHfP'	1450	13284	135	333	102	0	737	423	312	27	41
'fPfPHP'	1090	10181	109	235	79	0	531	296	237	8	24
'HHPdfP'	1701	13112	169	347	88	1	772	416	292	20	30
'PPHdfP'	722	6909	84	156	25	0	313	216	126	8	17
'dfPdfPHP'	262	2365	20	33	13	0	101	58	46	4	3
'HHfPdfP'	978	7073	77	221	47	2	374	211	131	8	8
'fPfPHdfP'	293	2170	20	40	9	0	101	62	33	1	3
'dfPdfPHfP'	113	1126	7	42	12	0	58	31	4	3	3
'NNAP'	465	4428	27	102	30	0	198	122	79	6	11
'AANP'	704	6382	85	186	41	0	362	267	110	9	20
'PPNA'	598	6522	86	160	32	0	367	212	143	8	21
'NNAfP'	570	6519	91	204	59	1	317	221	110	21	5
'AANfP'	651	7327	103	193	45	1	374	284	189	23	12
'fPfPNA'	657	7301	106	178	32	1	384	308	211	13	41
'NNAdfP'	265	3802	22	64	29	0	183	86	100	4	14
'AANdfP'	324	3788	52	74	20	1	167	117	113	6	11
'dfPdfPNA'	157	2066	31	21	12	0	85	45	32	5	4
'NNPfP'	464	6700	72	148	45	0	282	166	153	6	12
'PPNfP'	573	6780	88	139	38	0	330	228	140	10	12
'fPfPNP'	427	7067	56	140	48	0	321	187	144	14	11
'NNPdfP'	283	3420	42	68	20	0	171	90	63	5	9
'PPNdfP'	283	3928	36	39	21	1	152	135	92	6	5
'dfPdfPNP'	136	1713	35	28	11	0	67	49	37	2	2
'NNfPdfP'	241	3397	17	79	21	0	130	85	62	6	11
'fPfPNdfP'	198	2600	29	36	14	0	118	61	62	0	3
'dfPdfPNfP'	89	1224	14	22	8	0	50	18	20	3	4
'AAPfP'	707	6327	107	190	58	0	362	263	151	7	22
'PPAfP'	652	5965	76	154	44	0	349	260	142	5	16
'fPfPAP'	468	4744	52	132	23	0	247	167	83	2	7
'AAPdfP'	308	3196	50	74	16	1	160	118	69	9	7
'PPAdfP'	311	3434	62	115	22	0	187	123	87	3	7
'dfPdfPAP'	147	1237	10	36	4	0	40	41	27	2	2
'AAfPdfP'	215	2000	19	77	5	0	104	69	34	4	4
'fPfPAdfP'	145	1328	12	41	12	0	54	46	21	1	1
'dfPdfPAfP'	60	703	25	19	2	1	28	29	12	0	0
'PPfPdfP'	142	2415	22	38	2	0	77	61	35	2	5
'fPfPPdfP'	95	1365	14	32	4	0	48	25	20	0	8
'dfPdfPPfP'	51	689	2	8	2	0	23	12	8	0	3
'SSSS'	889	7534	61	136	84	0	406	191	240	8	37
'HHHH'	5353	37731	792	1267	509	8	2623	1925	1426	112	212
'NNNN'	42	290	7	10	6	0	13	6	7	0	2
'AAAA'	317	1608	102	54	20	3	116	85	73	5	13
'PPPP'	175	1787	33	37	19	1	92	73	66	1	23
'fPfPfPfP'	87	470	19	9	9	0	26	8	16	0	2
'dfPdfPdfPdfP'	3	26	1	0	1	0	0	2	2	0	1

## Sheet: heterodimer interfaces
four-tuples	A1	A2	A3	B1	C1	C2	D1	D2	E1	E2	F1
'SHNA'	565	4280	71	151	22	0	286	191	118	6	13
'SHNP'	486	3602	44	114	20	0	282	133	103	7	10
'SHNfP'	407	3150	27	117	18	0	251	125	94	3	20
'SHNdfP'	234	1677	11	42	7	0	130	68	64	0	4
'SHAP'	876	6638	118	288	42	0	492	387	258	19	39
'SHAfP'	557	4322	75	197	25	0	323	234	128	7	10
'SHAdfP'	273	2553	59	82	8	0	159	132	76	7	18
'SHPfP'	477	3429	62	132	26	0	264	172	98	5	11
'SHPdfP'	252	2402	21	84	7	0	166	114	67	8	10
'SHfPdfP'	128	1021	15	35	6	0	72	41	20	2	2
'SNAP'	360	2959	49	97	17	0	218	134	87	6	12
'SNAfP'	247	2308	34	84	16	0	155	112	66	4	8
'SNAdfP'	137	1341	29	50	6	0	100	61	40	2	4
'SNPfP'	228	2164	18	85	12	0	179	78	57	7	9
'SNPdfP'	117	1348	12	54	6	0	84	69	35	2	7
'SNfPdfP'	89	787	9	15	7	0	55	35	20	2	2
'SAPfP'	310	2681	49	106	16	0	185	149	86	6	10
'SAPdfP'	134	1663	39	52	8	0	113	77	51	9	9
'SAfPdfP'	82	820	11	19	4	0	53	36	24	4	4
'SPfPdfP'	84	812	12	24	3	0	47	35	17	5	7
'HNAP'	422	3024	40	124	27	0	231	149	93	3	5
'HNAfP'	346	2673	51	131	15	0	185	168	93	5	13
'HNAdfP'	165	1265	28	79	12	0	102	84	41	5	4
'HNPfP'	293	2467	36	95	17	1	175	127	89	4	15
'HNPdfP'	152	1435	26	50	12	0	113	72	58	2	4
'HNfPdfP'	111	954	6	39	12	0	61	49	25	4	5
'HAPfP'	403	3104	66	136	21	0	226	211	91	9	19
'HAPdfP'	208	1675	29	84	11	0	126	65	59	5	10
'HAfPdfP'	146	1005	30	39	2	0	71	61	33	3	2
'HPfPdfP'	120	866	15	26	5	0	51	38	24	1	5
'NAPfP'	215	1746	35	69	15	0	133	122	50	6	10
'NAPdfP'	94	969	15	40	9	0	67	43	41	3	4
'NAfPdfP'	70	603	17	27	5	0	42	25	22	0	3
'NPfPdfP'	62	763	8	29	7	0	50	27	28	0	1
'APfPdfP'	70	637	8	17	3	0	30	30	23	2	2
'SHHH'	622	4717	119	240	27	2	373	341	156	20	17
'SSSH'	199	2018	17	38	6	0	115	53	65	2	12
'SSHH'	517	4188	55	187	17	1	275	199	118	11	22
'SNNN'	10	108	0	3	0	0	4	3	0	0	0
'SSSN'	52	742	6	6	2	0	43	18	17	1	1
'SSNN'	45	573	1	16	0	0	29	18	11	0	3
'SAAA'	169	1151	61	66	8	0	88	101	38	4	5
'SSSA'	99	1420	13	44	6	0	94	51	42	2	5
'SSAA'	191	1800	29	80	9	0	106	98	58	5	8
'SPPP'	98	636	8	18	3	0	59	19	23	0	0
'SSSP'	122	1090	18	32	7	0	79	35	27	1	5
'SSPP'	191	1260	15	44	7	0	121	57	52	1	10
'SfPfPfP'	10	133	1	4	0	0	10	4	1	1	1
'SSSfP'	66	729	5	10	6	0	43	27	26	0	2
'SSfPfP'	42	511	9	10	3	0	25	21	18	5	4
'SdfPdfPdfP'	2	3	0	1	0	0	1	0	0	0	0
'SSSdfP'	60	328	5	13	2	0	31	14	10	0	3
'SSdfPdfP'	14	122	2	4	0	0	8	9	1	0	0
'HNNN'	10	99	1	0	0	0	6	0	1	0	0
'HHHN'	270	2070	26	64	7	0	117	90	46	3	9
'HHNN'	93	683	13	23	3	0	38	20	10	1	1
'HAAA'	279	1455	53	87	11	0	145	139	71	4	7
'HHHA'	523	4035	100	177	27	0	283	272	176	8	29
'HHAA'	491	3105	76	178	28	0	244	200	119	15	13
'HPPP'	111	588	5	18	6	0	43	22	21	2	7
'HHHP'	409	2879	49	116	25	0	217	151	92	9	13
'HHPP'	281	1653	25	70	10	0	142	94	61	1	2
'HfPfPfP'	20	133	4	15	0	0	9	5	2	1	0
'HHHfP'	264	2367	37	72	16	0	150	132	95	3	9
'HHfPfP'	143	885	13	36	6	0	56	37	33	1	1
'HdfPdfPdfP'	7	32	0	0	1	0	0	0	0	0	0
'HHHdfP'	181	1162	28	70	7	0	101	62	37	4	2
'HHdfPdfP'	29	206	2	4	1	0	14	8	3	0	1
'NAAA'	76	540	24	34	4	0	55	42	20	2	2
'NNNA'	18	117	3	4	0	0	7	3	2	0	0
'NNAA'	47	381	17	23	0	0	29	30	7	3	0
'NPPP'	55	302	4	12	2	0	30	17	8	0	1
'NNNP'	19	112	1	2	1	0	6	2	0	0	0
'NNPP'	38	297	2	18	3	0	11	16	8	0	2
'NfPfPfP'	12	183	0	9	0	0	15	9	7	0	3
'NNNfP'	17	107	1	7	2	0	6	3	0	0	0
'NNfPfP'	30	323	1	13	4	0	25	19	11	2	0
'NdfPdfPdfP'	4	31	0	1	0	0	1	1	0	0	0
'NNNdfP'	14	118	0	7	1	0	10	5	1	0	0
'NNdfPdfP'	13	127	1	5	1	0	12	8	7	0	1
'APPP'	62	533	6	19	3	0	38	29	24	2	1
'AAAP'	169	859	23	43	11	0	83	53	39	3	3
'AAPP'	142	997	15	25	6	0	101	52	48	2	5
'AfPfPfP'	11	82	4	5	1	0	2	7	1	1	0
'AAAfP'	78	570	14	29	2	0	29	44	18	2	1
'AAfPfP'	37	305	10	21	3	0	19	24	6	4	3
'AdfPdfPdfP'	2	10	0	2	0	0	0	0	0	0	0
'AAAdfP'	24	201	7	10	0	0	16	11	6	0	1
'AAdfPdfP'	11	93	2	8	2	0	14	9	5	0	1
'PfPfPfP'	7	95	0	4	0	0	4	4	5	0	0
'PPPfP'	31	247	4	6	3	0	19	9	4	0	1
'PPfPfP'	22	243	3	11	1	0	21	12	5	1	0
'PdfPdfPdfP'	1	4	0	0	0	0	0	0	0	0	0
'PPPdfP'	15	194	3	13	0	0	15	14	6	1	0
'PPdfPdfP'	8	75	5	5	0	1	5	3	0	1	1
'fPdfPdfPdfP'	0	2	0	0	0	0	0	0	0	0	0
'fPfPfPdfP'	2	20	0	1	0	0	3	1	0	0	0
'fPfPdfPdfP'	3	12	0	0	0	0	0	0	0	0	0
'SSHN'	272	2551	9	51	10	0	155	65	74	4	8
'HHSN'	500	3222	45	121	25	0	189	123	110	6	10
'NNSH'	113	1060	10	22	3	0	81	19	21	0	1
'SSHA'	506	4562	58	198	28	0	312	199	136	15	16
'HHSA'	900	6680	136	291	31	1	538	387	202	26	36
'AASH'	595	3890	86	180	24	1	306	273	147	8	21
'SSHP'	545	4080	57	143	21	0	317	191	132	18	16
'HHSP'	742	5288	88	270	38	0	368	301	147	16	22
'PPSH'	419	2787	41	99	31	0	223	129	111	4	11
'SSHfP'	258	2530	19	67	12	0	194	88	69	2	11
'HHSfP'	463	3483	54	157	32	0	250	186	92	9	13
'fPfPSH'	161	1180	15	40	12	0	71	47	32	3	3
'SSHdfP'	172	1632	15	56	12	0	118	39	52	1	5
'HHSdfP'	322	2071	23	99	10	0	136	100	66	4	5
'dfPdfPSH'	32	334	3	8	1	0	14	7	8	0	1
'SSNA'	200	2129	14	84	15	0	137	80	56	5	14
'NNSA'	97	963	15	40	6	0	60	46	22	2	6
'AASN'	191	1671	50	99	12	1	143	104	61	3	8
'SSNP'	184	1822	15	52	7	0	102	62	49	4	7
'NNSP'	63	772	4	25	3	0	48	28	16	2	1
'PPSN'	172	1313	7	38	9	0	81	46	44	1	8
'SSNfP'	111	1425	16	37	6	0	81	57	33	2	8
'NNSfP'	74	790	7	39	7	0	43	35	23	0	1
'fPfPSN'	76	916	7	23	5	0	50	35	29	3	6
'SSNdfP'	80	783	3	23	3	0	56	23	27	2	1
'NNSdfP'	55	516	3	16	5	0	30	9	12	0	0
'dfPdfPSN'	27	227	14	9	1	0	8	4	3	0	0
'SSAP'	347	3217	56	93	22	0	218	165	107	9	12
'AASP'	382	2652	44	131	19	0	203	164	123	6	22
'PPSA'	298	2424	33	65	17	0	188	121	99	4	12
'SSAfP'	162	1891	26	81	14	1	123	104	48	11	10
'AASfP'	206	1538	36	87	4	1	90	82	46	3	6
'fPfPSA'	88	763	21	42	2	1	48	41	20	4	6
'SSAdfP'	100	1147	12	43	1	0	84	59	45	4	9
'AASdfP'	98	803	12	27	4	0	52	59	33	0	5
'dfPdfPSA'	22	199	7	11	1	0	16	16	5	1	0
'SSPfP'	166	1567	19	48	6	0	93	55	46	2	10
'PPSfP'	158	1139	10	42	9	0	84	41	28	0	4
'fPfPSP'	77	715	12	23	4	0	57	34	20	0	4
'SSPdfP'	96	1032	14	29	3	1	64	49	34	5	10
'PPSdfP'	63	785	11	29	4	0	61	49	25	4	2
'dfPdfPSP'	17	208	9	11	1	0	9	15	3	1	0
'SSfPdfP'	44	463	11	15	4	0	24	22	14	2	4
'fPfPSdfP'	9	204	2	10	1	0	13	11	1	0	0
'dfPdfPSfP'	12	63	0	2	0	0	0	0	1	0	0
'HHNA'	409	3007	54	105	14	0	240	141	78	12	9
'NNHA'	128	873	22	44	7	0	52	33	12	0	2
'AAHN'	267	1907	52	80	10	0	167	106	65	8	1
'HHNP'	357	2215	38	85	19	0	175	101	78	5	8
'NNHP'	134	739	13	16	6	0	57	32	25	2	2
'PPHN'	179	1263	11	54	10	0	88	56	42	2	6
'HHNfP'	302	2390	29	97	19	0	178	122	97	6	10
'NNHfP'	126	842	12	45	8	0	67	37	19	4	4
'fPfPHN'	115	1046	10	38	5	0	87	51	40	2	5
'HHNdfP'	174	1098	29	48	13	0	84	49	38	5	5
'NNHdfP'	70	535	6	11	1	0	31	15	14	0	1
'dfPdfPHN'	28	315	10	16	2	0	29	15	5	5	3
'HHAP'	572	4748	98	178	29	1	341	275	185	19	33
'AAHP'	461	2877	45	130	22	0	246	174	129	12	17
'PPHA'	297	2356	29	82	14	0	199	114	83	2	8
'HHAfP'	463	3605	69	149	24	1	283	242	125	19	10
'AAHfP'	295	2035	55	99	17	1	165	174	77	6	8
'fPfPHA'	141	960	35	54	9	0	61	72	36	5	3
'HHAdfP'	241	1590	43	85	10	0	114	88	51	7	3
'AAHdfP'	118	925	17	59	2	0	72	54	26	1	6
'dfPdfPHA'	39	268	6	18	1	0	24	15	12	0	1
'HHPfP'	348	2374	48	101	18	2	150	116	90	7	8
'PPHfP'	181	1112	19	42	11	0	86	62	38	1	5
'fPfPHP'	135	746	14	37	11	0	43	43	19	1	2
'HHPdfP'	217	1409	16	45	10	0	79	64	44	1	7
'PPHdfP'	99	880	13	29	9	0	47	47	22	5	4
'dfPdfPHP'	25	273	4	6	1	0	6	11	10	0	0
'HHfPdfP'	105	794	15	27	5	0	52	32	19	1	1
'fPfPHdfP'	36	200	2	9	2	0	18	7	2	1	1
'dfPdfPHfP'	13	86	1	1	0	0	7	1	2	0	0
'NNAP'	75	679	6	32	4	0	44	37	23	1	3
'AANP'	211	1197	25	55	7	0	88	58	51	1	10
'PPNA'	141	1072	8	33	12	0	91	28	35	3	4
'NNAfP'	68	628	5	32	3	0	41	32	13	3	1
'AANfP'	87	891	32	52	3	0	64	68	29	1	3
'fPfPNA'	62	637	16	25	9	0	37	36	18	3	2
'NNAdfP'	41	314	4	16	0	0	23	13	10	1	1
'AANdfP'	62	394	8	33	7	0	30	34	12	1	1
'dfPdfPNA'	24	176	14	12	1	0	12	15	0	1	1
'NNPfP'	63	689	9	25	3	0	34	27	18	1	4
'PPNfP'	97	813	10	29	5	0	61	38	24	1	2
'fPfPNP'	59	680	9	17	4	0	37	35	21	0	8
'NNPdfP'	45	464	5	14	6	0	31	15	5	2	2
'PPNdfP'	64	525	7	25	3	0	43	29	19	1	0
'dfPdfPNP'	17	192	4	8	3	1	8	10	3	1	0
'NNfPdfP'	33	315	5	6	5	0	28	13	13	1	2
'fPfPNdfP'	14	255	0	5	1	0	18	9	3	1	0
'dfPdfPNfP'	16	119	1	7	1	0	5	4	3	0	0
'AAPfP'	114	1123	15	52	9	0	92	76	49	3	5
'PPAfP'	116	955	17	49	7	0	59	53	39	1	8
'fPfPAP'	61	574	12	28	3	0	35	28	22	3	0
'AAPdfP'	75	563	16	19	5	0	59	32	20	2	3
'PPAdfP'	57	535	5	24	2	0	37	30	19	1	5
'dfPdfPAP'	13	154	8	8	2	0	9	15	4	1	0
'AAfPdfP'	44	307	7	14	2	0	15	11	18	0	2
'fPfPAdfP'	18	143	4	5	1	0	10	9	2	0	1
'dfPdfPAfP'	8	67	0	0	1	0	4	2	1	0	0
'PPfPdfP'	30	318	4	7	5	0	16	9	5	0	2
'fPfPPdfP'	16	154	1	2	0	0	16	7	2	0	0
'dfPdfPPfP'	12	83	0	3	1	0	7	1	1	0	0
'SSSS'	54	287	0	6	2	0	26	8	10	1	1
'HHHH'	247	2329	54	110	13	0	178	179	100	9	16
'NNNN'	0	2	0	0	0	0	0	0	0	0	0
'AAAA'	61	341	13	24	0	0	32	45	15	1	6
'PPPP'	32	94	1	5	3	0	6	4	4	0	0
'fPfPfPfP'	1	15	0	1	0	0	0	0	0	0	0
'dfPdfPdfPdfP'	0	0	0	0	0	0	0	0	0	0	0
